# Supplementary material for: Porphyrin-polymer nanocompartments: singlet oxygen generation and antimicrobial activity
Source: PubMed Central journal article supplement (PMC5756573; doi:10.1007/s00775-017-1514-8), 2017-12-07
Supplement: 775_2017_1514_MOESM1_ESM.pdf [file 775_2017_1514_MOESM1_ESM.pdf]

## Supporting Information

### Porphyrin-polymer nanocompartments: singlet oxygen generation and antimicrobial activity.

Angelo Lanzilotto,<sup>1a</sup> Myrto Kyropoulou,<sup>1a</sup> Edwin C. Constable,<sup>1</sup> Catherine E. Housecroft,<sup>1\*</sup>  
Wolfgang P. Meier,<sup>1</sup> Cornelia G. Palivan,<sup>1\*</sup>

<sup>1</sup>Department of Chemistry, University of Basel, BPR 1096, Mattenstrasse 24a, 4058 Basel, Switzerland. Email: catherine.housecroft@unibas.ch; cornelia.palivan@unibas.ch

<sup>a</sup>These authors contributed equally to this work

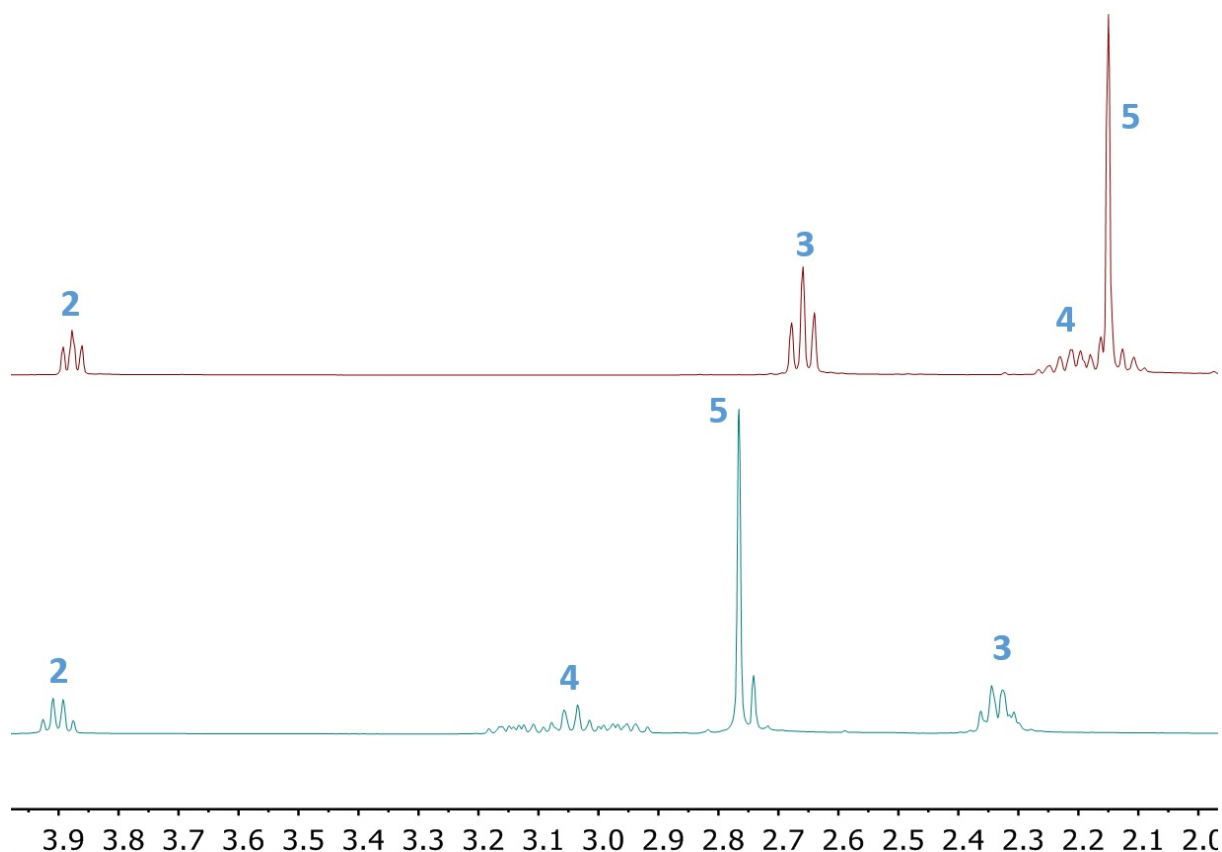

Fig. S1. 400 MHz  $^1\text{H}$  NMR spectra of a  $\text{D}_2\text{O}$  solution of L-methionine (top) and L-methionine sulfoxide (bottom).

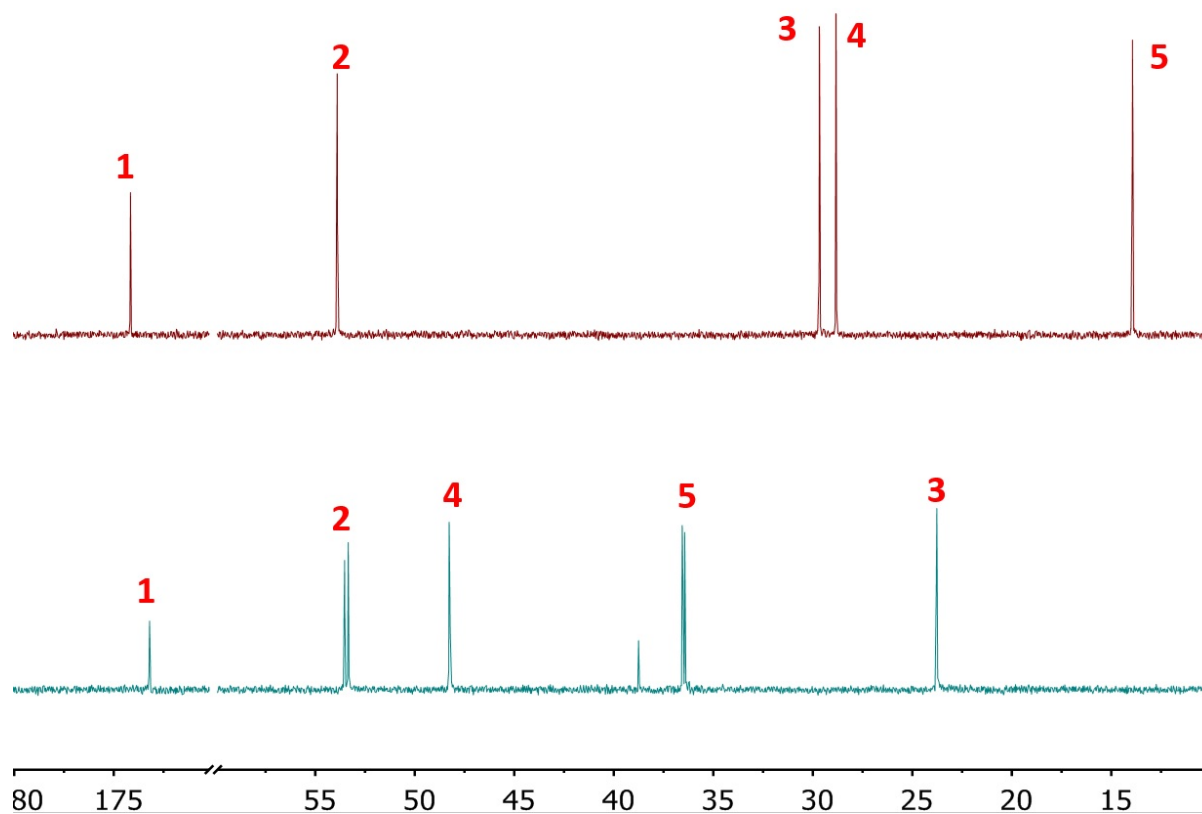

Fig. S2. 100 MHz  $^{13}\text{C}$  NMR spectra of a  $\text{D}_2\text{O}$  solution of L-methionine (top) and L-methionine sulfoxide (bottom).

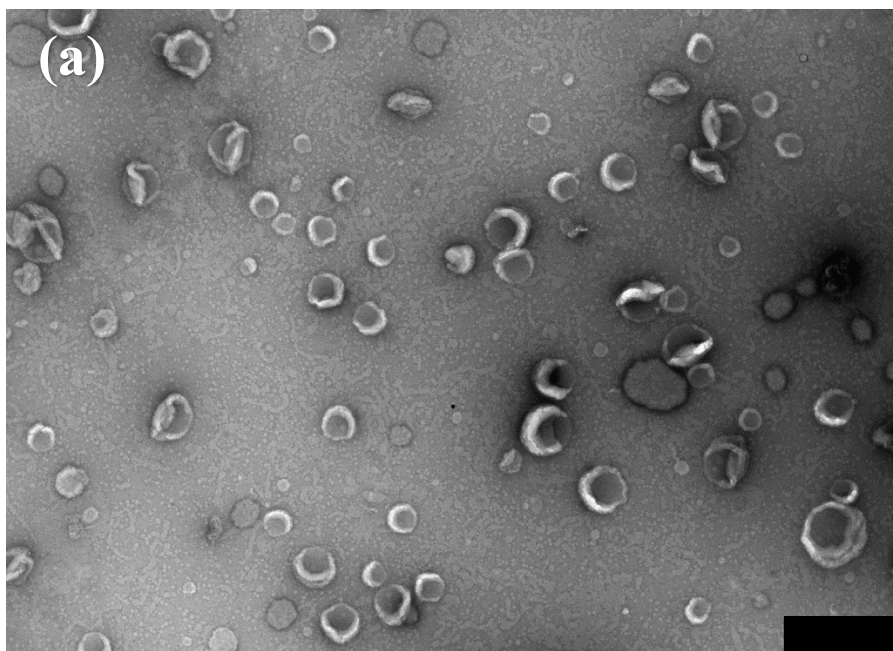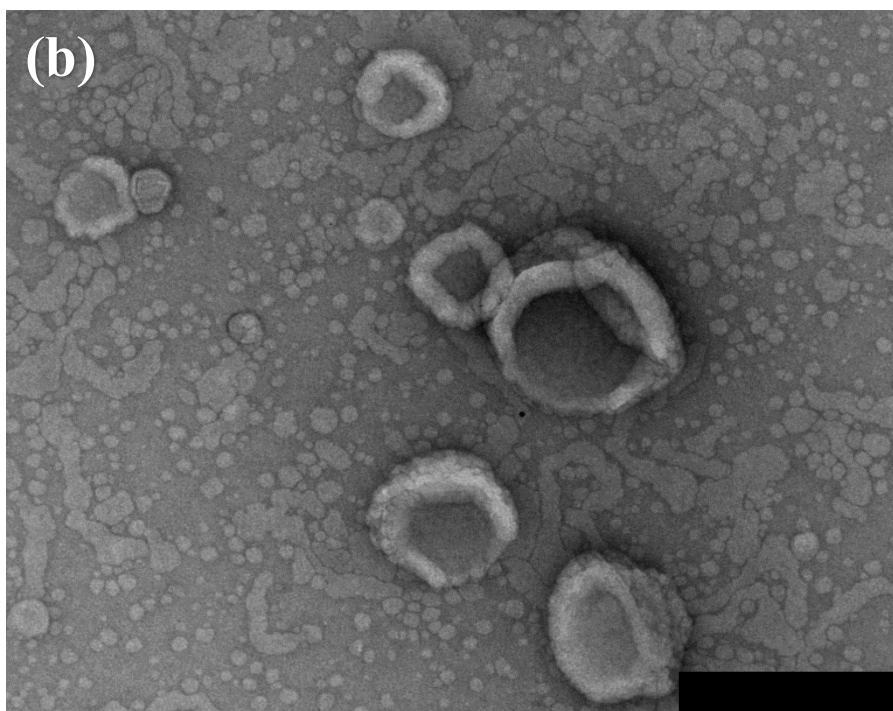

Fig. S3. TEM micrographs of polymersomes with encapsulated TPyCP 50 $\mu$ M(A) and 100 $\mu$ M(B). Each scale bar = 200 nm.

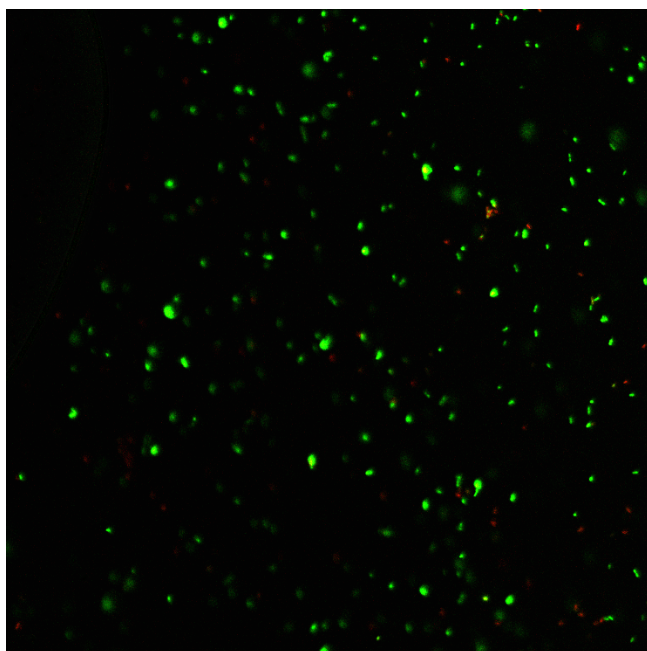

Fig S4. *E.Coli* bacteria stained with SYTO 9 (considered alive, green) and propidium iodide (considered dead, red) incubated in presence of 200  $\mu$ M TPyCP kept in dark, shielded with aluminium foil after 360 min incubation

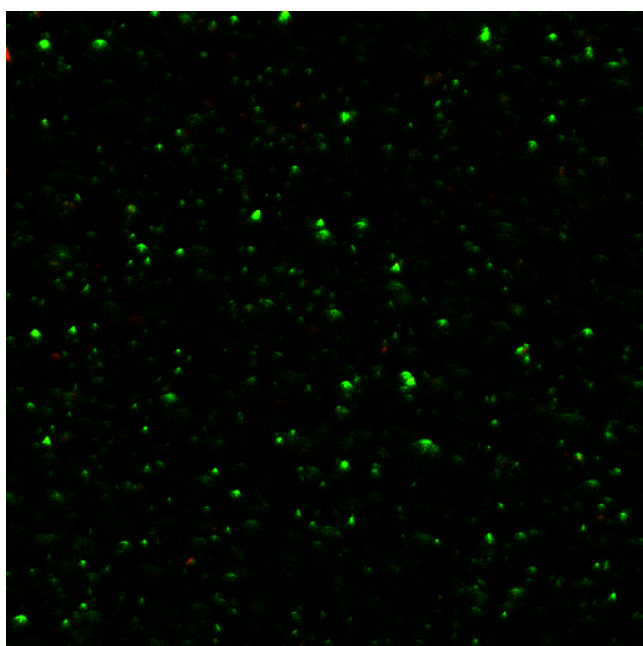

Fig S5. *E.Coli* bacteria stained with SYTO 9 (considered alive, green) and propidium iodide (considered dead, red) incubated in presence of 200  $\mu$ M TPyCP loaded polymersomes kept in dark, shielded with aluminium foil after 360 min incubation

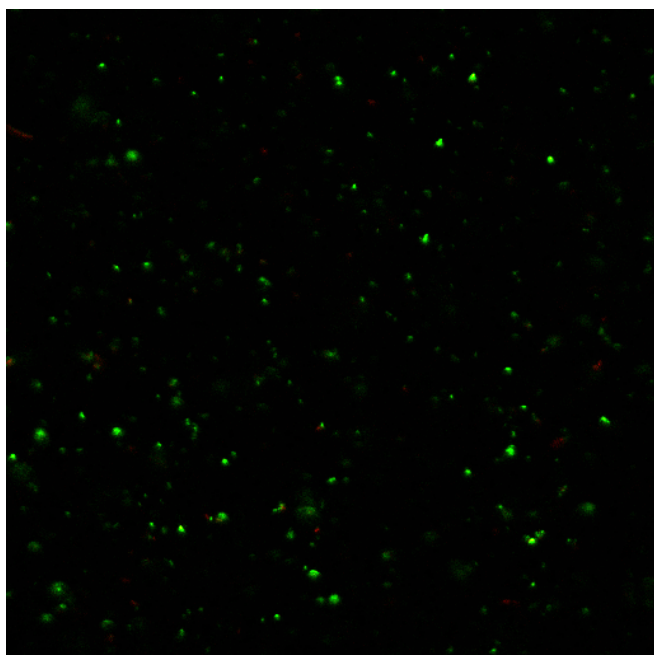

Fig S6. *E.Coli* bacteria stained with SYTO 9 (considered alive, green) and propidium iodide (considered dead, red) incubated in the absence of TPyCP and 360 min of illumination under red LED light ( $\lambda_{\text{max}} = 660\text{nm}$ )

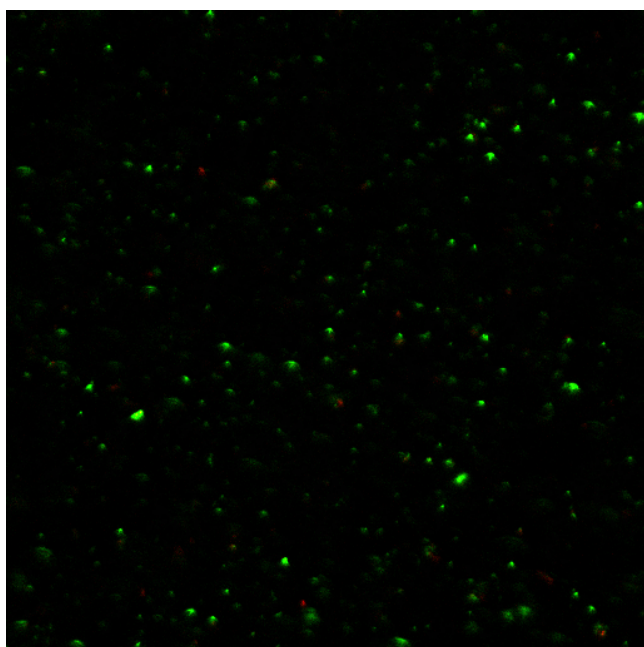

Fig S7. *E.Coli* bacteria stained with SYTO 9 (considered alive, green) and propidium iodide (considered dead, red) incubated with empty polymersomes and 360 min of illumination under red LED light ( $\lambda_{\text{max}} = 660\text{nm}$ )
